# Supplementary material for: The Motility of a Human Parasite, Toxoplasma gondii, Is Regulated by a Novel Lysine Methyltransferase
Source: PubMed Central journal article supplement (PMC3164638; doi:10.1371/journal.ppat.1002201), 2011-09-01
Supplement: ppat.1002201.s001.pdf [file ppat.1002201.s001.pdf]

**A**

|               |                                                                               |  |
|---------------|-------------------------------------------------------------------------------|--|
|               | <b>GXG</b>                                                                    |  |
| T. gondii     | ATKVQVKHVP <b>PKGR</b> CLYTKHDLEPGSIIIFVETPVLVVAIPSLDEELWSVLTEINDEEALEL       |  |
| N. caninum    | ATKVQVRHV <b>PKGR</b> CLYTKHDLEPGAIIFVETPVLVVAIPSLDEELWSALTEINDEEALEL         |  |
| P. falciparum | ---VEIFNV <b>KGGR</b> CMFTKKKLDPGSVIFVENPILIVTPNLNEQLWTYLNKLNDEQNFEL          |  |
| C. parvum     | HESVEVRYTES <b>KGR</b> CLYARKCFNPGDIIFAESPLLVTPELAPELSEFLEDMNSKETFTTL         |  |
| B. bovis      | LSLVEIAPAP <b>PKGR</b> CMYTRRAYEPGEIIIIEKPLFAITPDSNSNIWDTLMTLHQEQPLHL         |  |
| T. annulata   | -SLVRVSEVP <b>PKGR</b> CLFVRKAFDPGELIFAESPLFMIDPTSNOELWDELNKLNEESPFVL         |  |
|               | *.: . .****: :. : : * : * : * . * : : * : : * : : : . *                       |  |
|               | <b>Motif I</b>                                                                |  |
| T. gondii     | PPVWHLAAICSLTMLDDEKIKICLDKWVPDPDRAPSDDVLRVINRAGLQ-----                        |  |
| N. caninum    | PPVWHLAAICSLTMLDDEKQICLDKWVPDPDRPPSDDVLRVINRAGLE-----                         |  |
| P. falciparum | PLKWHYAALCSITMLNDFNYKACLDKWVPEPDKEPDNDIYNVLDKVCEKTSFVNGNKYYY                  |  |
| C. parvum     | PPLWHVAALCTLTMLEEDKAIICLDKWVPDPSAEPSYDVQKIIENTGID-----                        |  |
| B. bovis      | PPLWHHAALVSILEGNEEKLEIMKGGKWLNDNDPPVSEDVYRILEVTCAEHR---DGSFVY                 |  |
| T. annulata   | PPLWHKAALFSILEGNEESNSILENKWVENRNOEVSADVLRVLSICTIE---DGEFYF                    |  |
|               | * ** * : : : : . . . . * : : : :                                              |  |
|               | <b>Motif II</b>                                                               |  |
|               | <b>RFINHxCxPN</b>                                                             |  |
| T. gondii     | -----VHPKLYERMLMVWRYSFGHHTEQHGLVLYNRI <b>SMAHSCR</b> RATACWHYGEDDAFI          |  |
| N. caninum    | -----VHPQLYERMLMVWRYSFGHHTEQQGLVLYNRI <b>SMAHSCR</b> RATACWHYGEDDAFV          |  |
| P. falciparum | YKNKLIDPKIYSRIIQVWHYNAFGHHTDNEGLVLYNRI <b>SMLAHSC</b> ISTACWHYGENDSFV         |  |
| C. parvum     | -----VDPHLYERTLNAWRFSNFN-HTSNNGIVLYNVI <b>SMAHNC</b> GASCWHYGVDNDFV           |  |
| B. bovis      | HNGTVICPNLYQFLLQVWPLNAFAHSTHPQGLVIYDKISYLA <b>HS</b> CDSSATWNHYGEDIFV         |  |
| T. annulata   | D-GVVIKPEVYQLYLQVWPLNAFGRTSEPDGLVIYDKISYVA <b>HS</b> CNPSCCWHHTENDEFV         |  |
|               | : * . * : : * * : : . * : * : * : * : * : * : * : * : * : * :                 |  |
|               | <b>Motif III</b>                                                              |  |
|               | <b>ELxFDY</b>                                                                 |  |
| T. gondii     | LRARVKLQAG <b>DEL</b> TISYIGDDDLFKSTNVRREKVYGWLF <b>TCQ</b> CVRCAAPVDNARGFRCP |  |
| N. caninum    | LRARVKLQAG <b>DEL</b> TISYIGDDDLFKSTNVRREKVQGWLF <b>TCQ</b> CVRCAAPVDNARGFRCP |  |
| P. falciparum | LRARINLNP <b>GE</b> ITISYIGDDDLKSSNIREKLTNWL <b>FVCM</b> CSRCTHPVDNCRGFRCSS   |  |
| C. parvum     | LRAKTRLEV <b>GE</b> ITISYISDDDLFKCSKTRRELLSNWL <b>FVCM</b> CERCNNPTDLSRGLKAS  |  |
| B. bovis      | LRARKLQIG <b>DEL</b> TISYIGEADLLATP-----SKWD-----                             |  |
| T. annulata   | LRARKLVP <b>GE</b> ITISYIGETDLLSPTFRRRTLLQNW <b>HFCT</b> CERCSPIDNCRGFLCKC    |  |
|               | ***: . * ** : * * : : : : * : : * : : * : : * : : * : : * : : * :             |  |
|               | <b>Motif IV</b>                                                               |  |
|               | <b>Zn-binding</b>                                                             |  |
| T. gondii     | CGTGAMFF                                                                      |  |
| N. caninum    | CGTGAMFF                                                                      |  |
| P. falciparum | CGIGTFF-                                                                      |  |
| C. parvum     | CGVGSMTF                                                                      |  |
| B. bovis      | -----                                                                         |  |
| T. annulata   | CHYGTIF-                                                                      |  |

**B**

MARTKQTARKSTGGKAPRK**QLATKA**ARKSAPSTGGVKKPHRYRPGTVALREIRRYQKSTELLIRKLPFQRL  
VREIAQDFKTDLRFQSAIIGALQEQASEAYLVGLFEDTNLCAIHAKR**VTIMP**KDIQLARRIGERA

**C**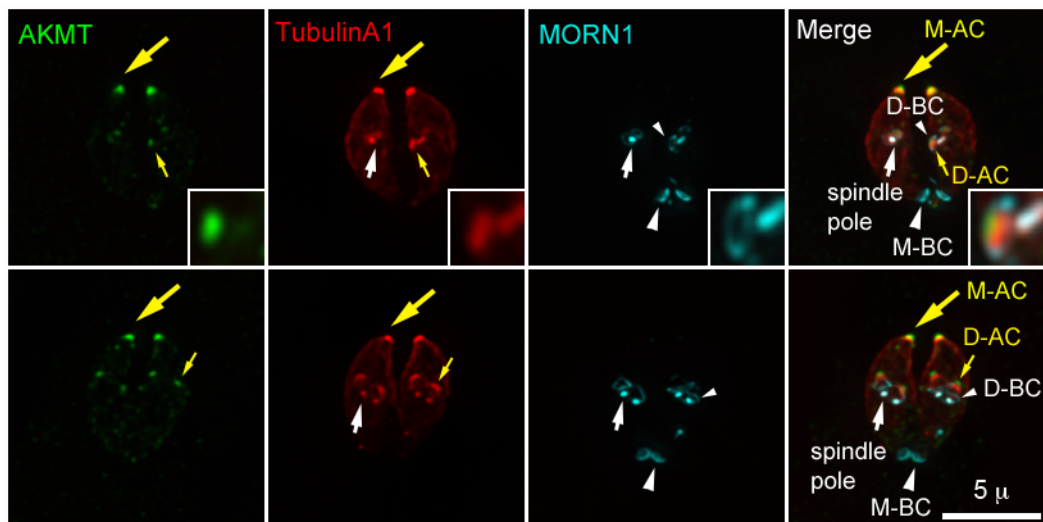

Figure S1
