# Supplementary material for: The Motility of a Human Parasite, Toxoplasma gondii, Is Regulated by a Novel Lysine Methyltransferase
Source: PubMed Central journal article supplement (PMC3164638; doi:10.1371/journal.ppat.1002201), 2011-09-01
Supplement: ppat.1002201.s002.pdf [file ppat.1002201.s002.pdf]

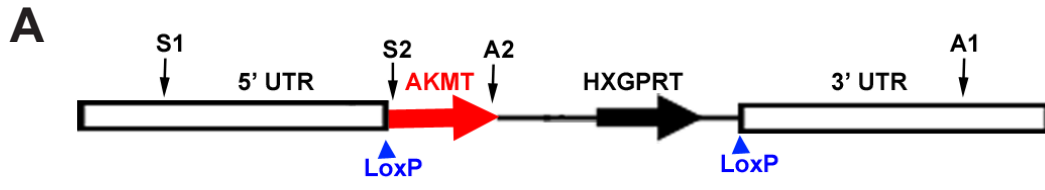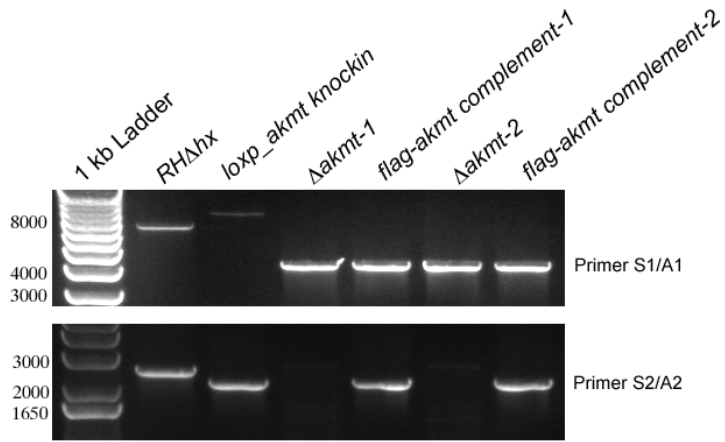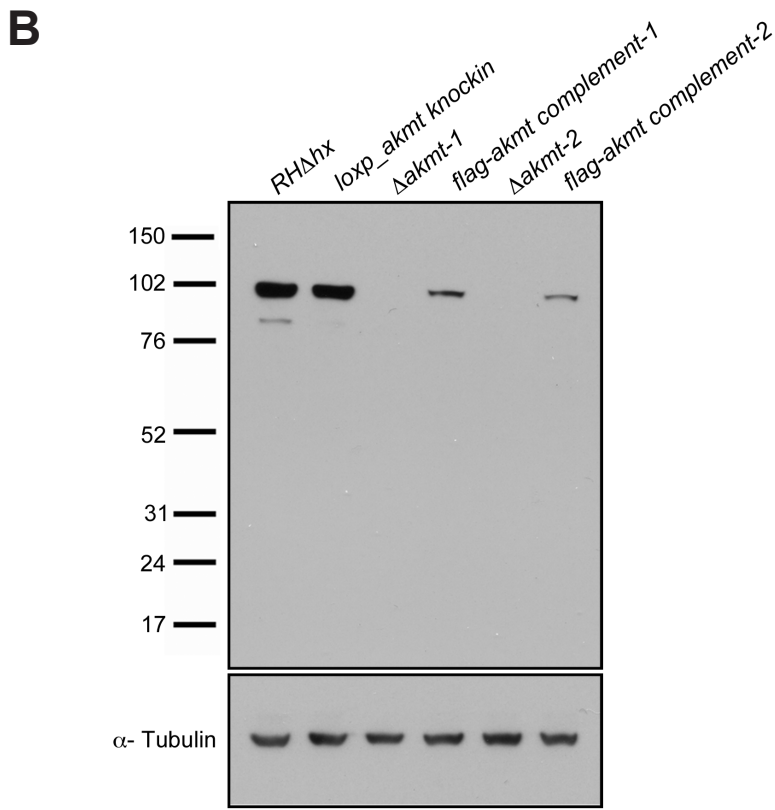

Figure S2
